# Supplementary material for: Circularly polarized luminescence from oriented polymer films doped with a tetraphenylethylene-based conjugated oligomer
Source: Royal Society of Chemistry journal article supplement (doi:10.1039/d1qm00482d), 2021-01-01
Supplement: d1qm00482d1.pdf [file d1qm00482d1.pdf]

*Electronic Supplementary Information (ESI)*

## **Circularly polarized luminescence from oriented polymer films doped with a tetraphenylethylene-based conjugated oligomer**

Wan Zhang,<sup>a</sup> Baining Ni,<sup>a</sup> Hongkun Li,<sup>\*ab</sup> Yonggang Yang,<sup>\*a</sup> Yongfang Li<sup>a</sup> and Ben Zhong Tang<sup>bc</sup>

<sup>a</sup> *State and Local Joint Engineering Laboratory for Novel Functional Polymeric Materials, Laboratory of Advanced Optoelectronic Materials, College of Chemistry, College of Chemistry, Chemical Engineering and Materials Science, Soochow University, Suzhou 215123, P. R. China. E-mail: H. Li, hkli@suda.edu.cn; Y. Yang, ygyang@suda.edu.cn*

<sup>b</sup> *State Key Laboratory of Luminescent Materials and Devices, Key Laboratory of Luminescence from Molecular Aggregates of Guangdong Province, Center for Aggregation-Induced Emission, South China University of Technology, Guangzhou, 510640, China*

<sup>c</sup> *Department of Chemistry, The Hong Kong University of Science & Technology (HKUST), Clear Water Bay, Kowloon, Hong Kong, China*

### **Table of Contents**

**Scheme S1.** Synthetic route to TPETffBT.

**Table S1.** The mass percentages of compounds in the prepolymerized mixtures.

**Fig. S1** FTIR spectra of M-1 (A), M-2 (B) and TPETffBT (C).

**Fig. S2** <sup>1</sup>H NMR spectrum of TPETffBT in CDCl<sub>3</sub>.

**Fig. S3** <sup>13</sup>C NMR spectrum of TPETffBT in CDCl<sub>3</sub>.

**Fig. S4** TGA curve of TPETffBT recorded under at a heating rate of 10 °C/min.

**Fig. S5** UV-Vis spectra of TPETffBT in THF solution, concentration: 10 μM.

**Fig. S6** POM images of C6M with 1.38 wt% R-5011 and 0.1 wt% TPETffBT at different temperatures.

**Fig. S7** DSC curves of the CLC mixtures with different weight ratios of TPETffBT.

**Fig. S8** POM images of the mixtures of C6M, RM105, BDK, 1.38 wt% S-5011 with 0.1 wt% (A), 0.5 wt% (B), 1 wt% (C), and 2 wt% (D) TPETffBT at 90 °C.

**Fig. S9** FESEM images of the cross-section of the R-/S-T-CLC film with different weight ratio of TPETffBT.

**Fig. S10** PL spectra of S-T-CLC films with different weight ratios of TPETffBT, λ<sub>ex</sub>: 457 nm.

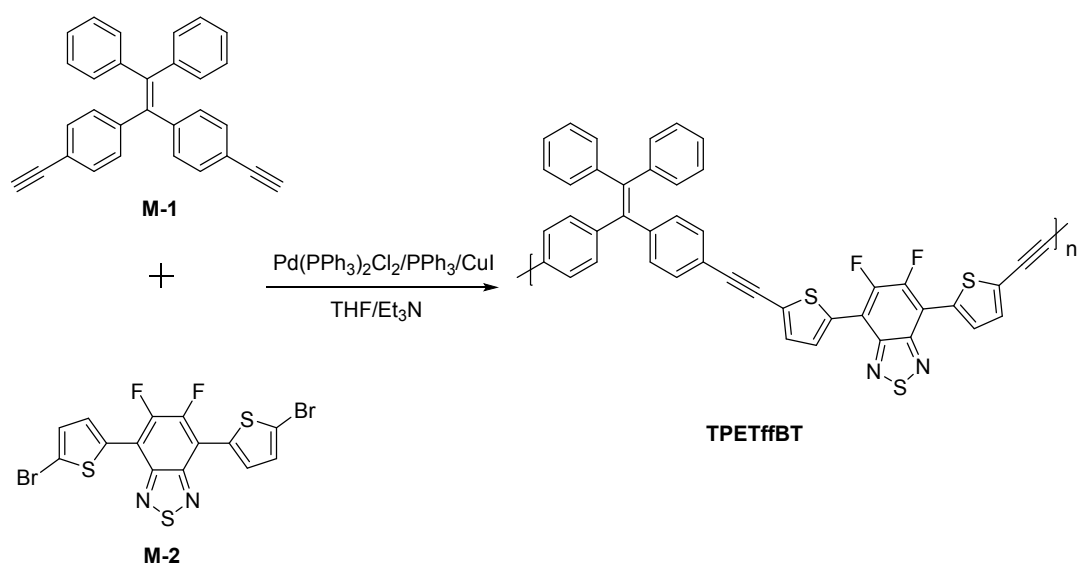

**Scheme S1.** Synthetic route to TPETffBT.

**Table S1.** The mass percentages of compounds in the prepolymerized mixtures.

| Sample<br>Compound | <i>R-/S-0.1%-T-CLC</i> | <i>R-/S-0.5%-T-CLC</i> | <i>R-/S-1%-T-CLC</i> | <i>R-/S-2%-T-CLC</i> |
|--------------------|------------------------|------------------------|----------------------|----------------------|
| C6M                | 77.52                  | 77.12                  | 76.62                | 75.62                |
| R-/S-5011          | 1.38                   | 1.38                   | 1.38                 | 1.38                 |
| RM105              | 20.00                  | 20.00                  | 20.00                | 20.00                |
| TPETffBT           | 0.10                   | 0.50                   | 1.00                 | 2.00                 |
| BDK                | 1.00                   | 1.00                   | 1.00                 | 1.00                 |

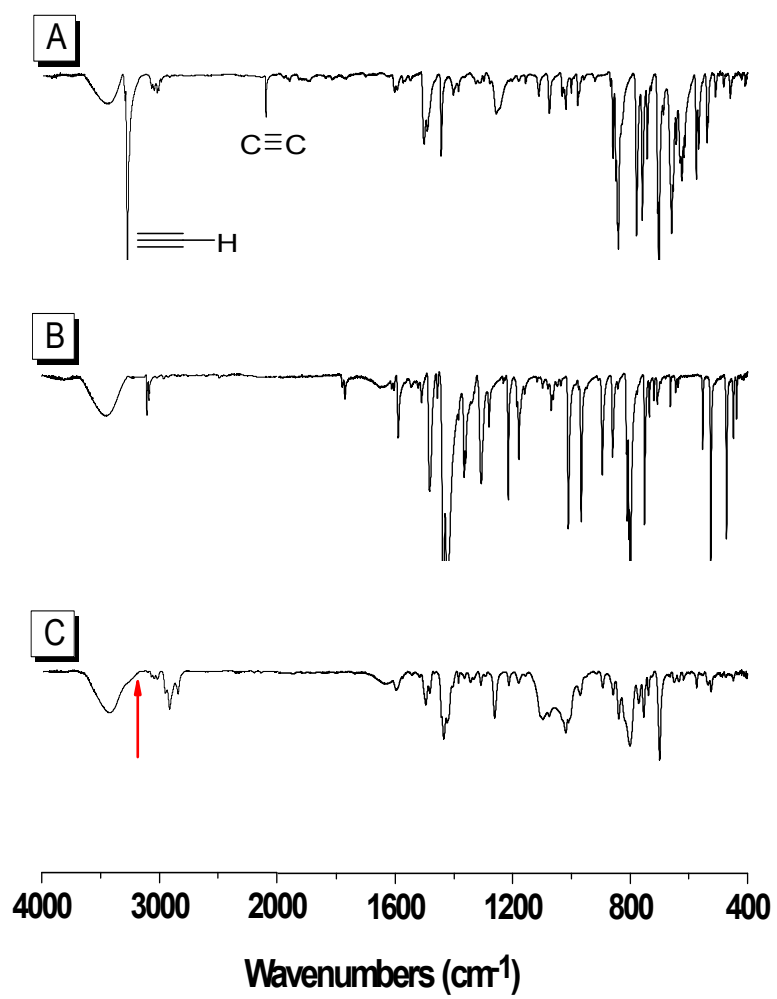

Fig. S1 FTIR spectra of M-1 (A), M-2 (B) and TPETffBT (C).

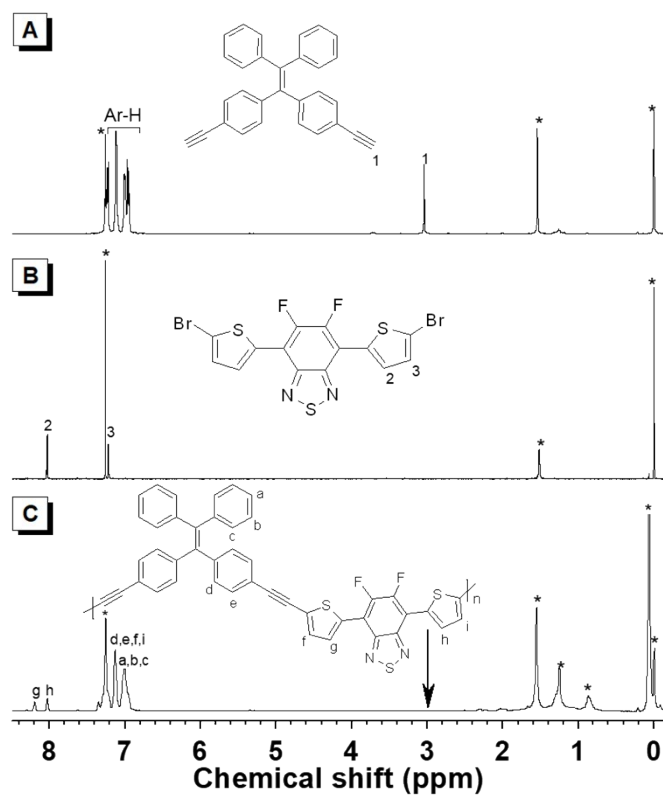

**Fig. S2**  $^1\text{H}$  NMR spectra of M-1 (A), M-2 (B) and TPETffBT (C) in  $\text{CDCl}_3$ . The solvents and water peaks are marked with asterisks.

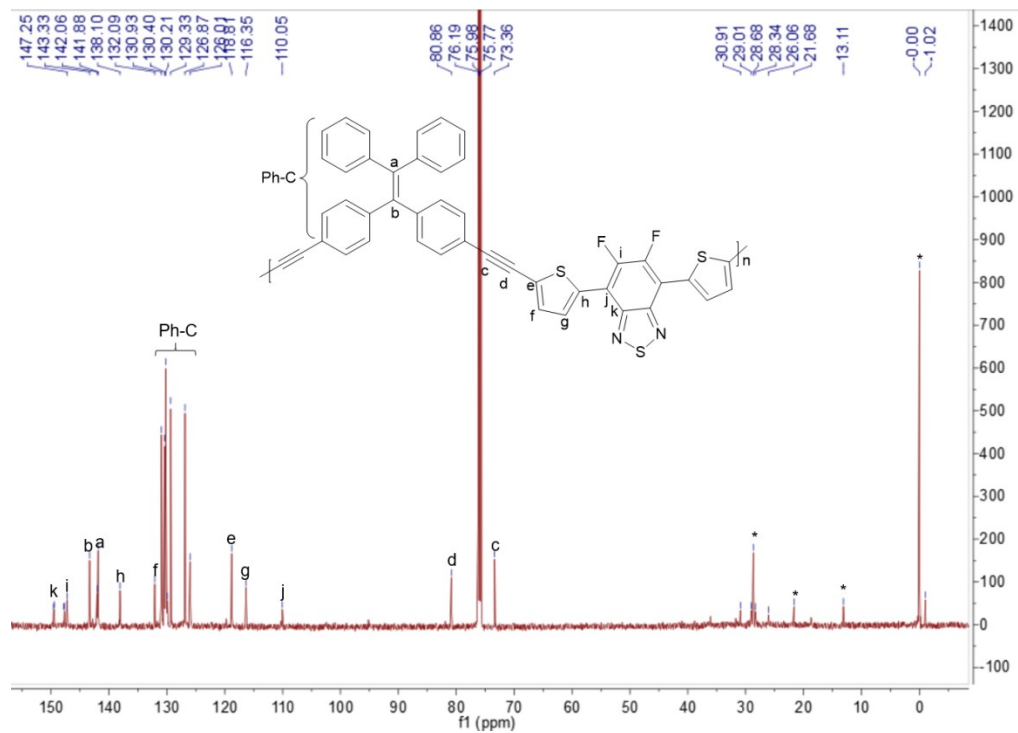

**Fig. S3**  $^{13}\text{C}$  NMR spectra of TPETffBT in  $\text{CDCl}_3$ . The solvents are marked with asterisks.

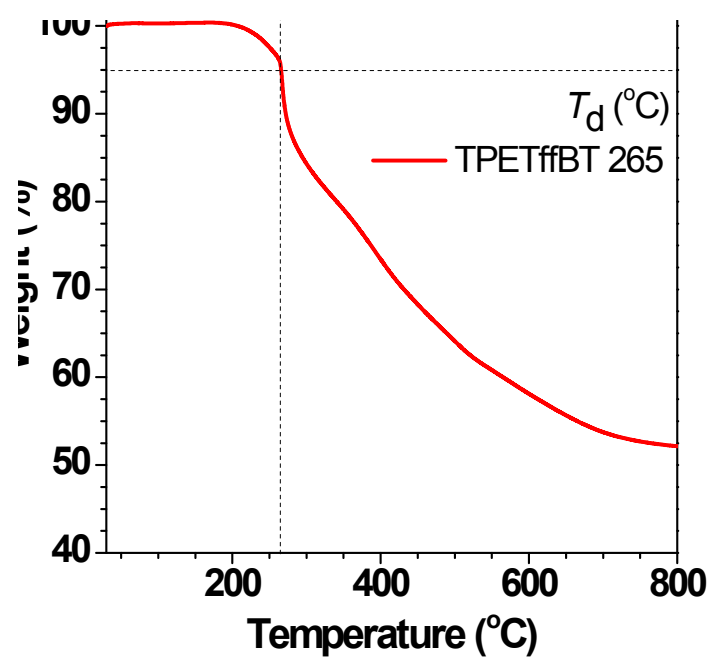

Fig. S4 TGA curve of TPETffBT recorded under at a heating rate of 10°C/min.

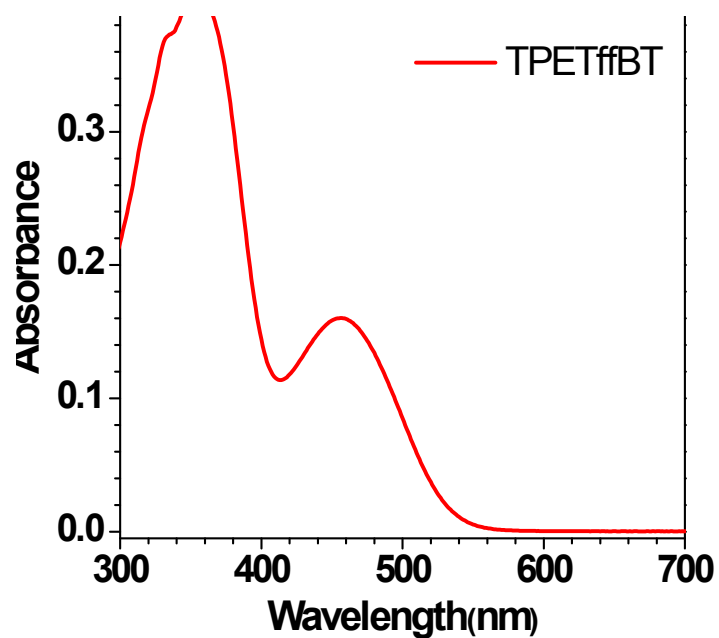

Fig. S5 UV-Vis spectra of TPETffBT in THF solution, concentration: 10  $\mu$ M.

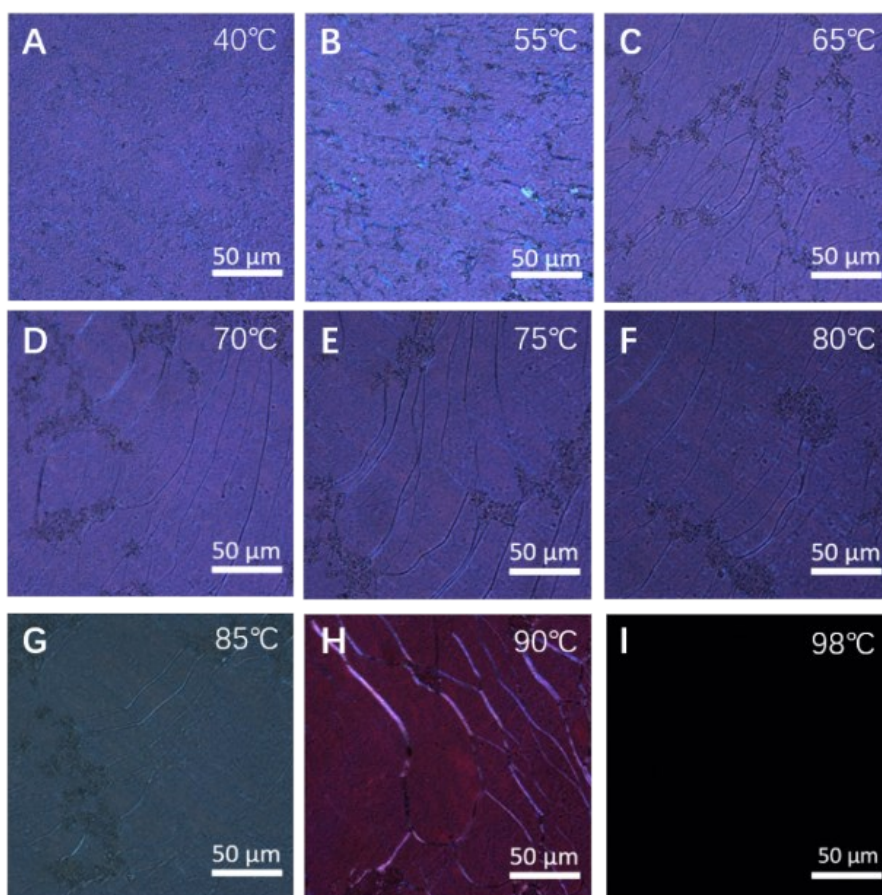

**Fig. S6** POM images of C6M with 1.38 wt% R-5011 and 0.1 wt% TPETffBT at different temperatures.

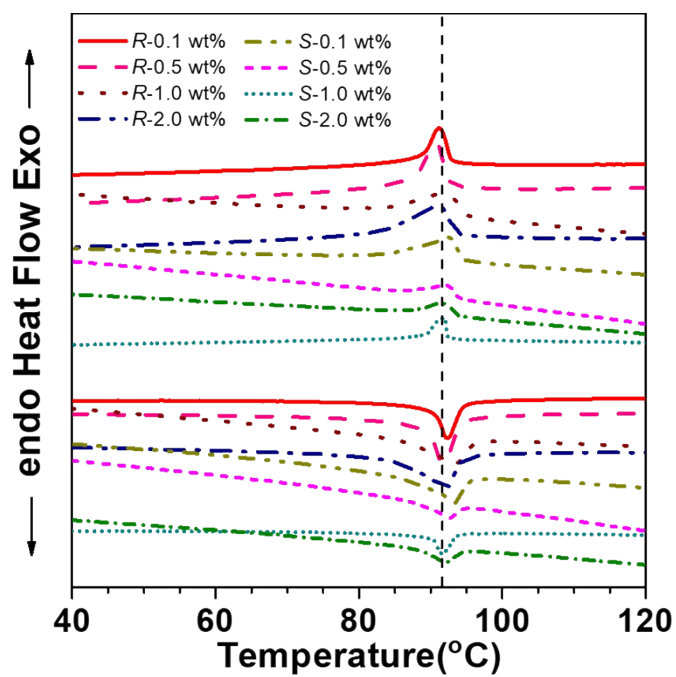

**Fig. S7** DSC curves of the CLC mixtures with different weight ratios of TPETffBT.

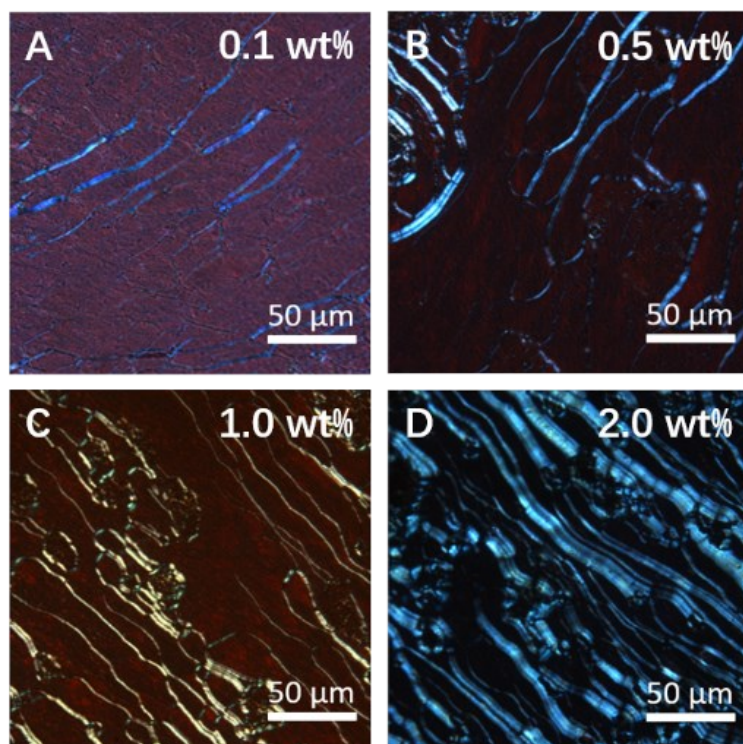

**Fig. S8** POM images of the mixtures of C6M, RM105, BDK, 1.38 wt% S-5011 with 0.1 wt% (A), 0.5 wt% (B), 1 wt% (C), and 2 wt% (D) TPETffBT at 90 °C.

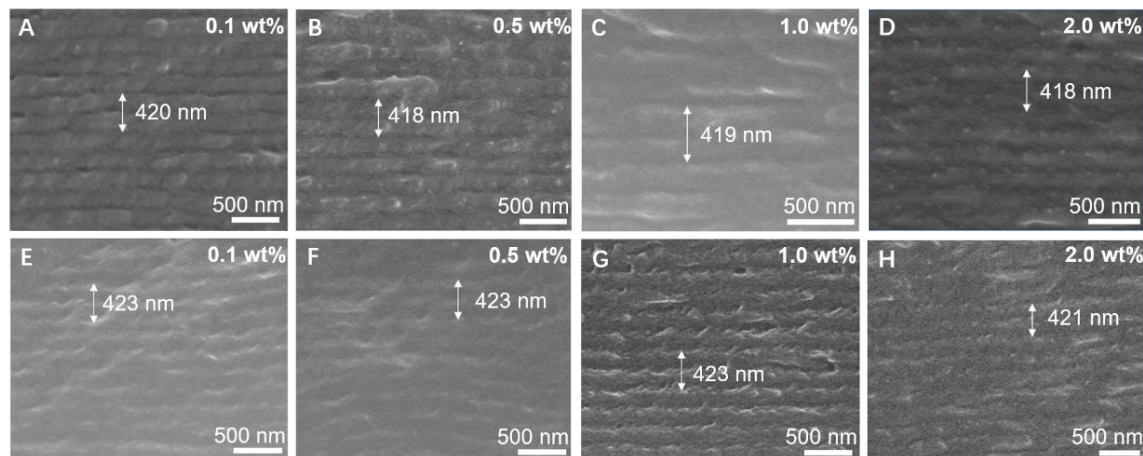

**Fig. S9** FESEM images of the cross-section of the *R-/S-T-CLC* film with different weight ratio of TPETffBT.

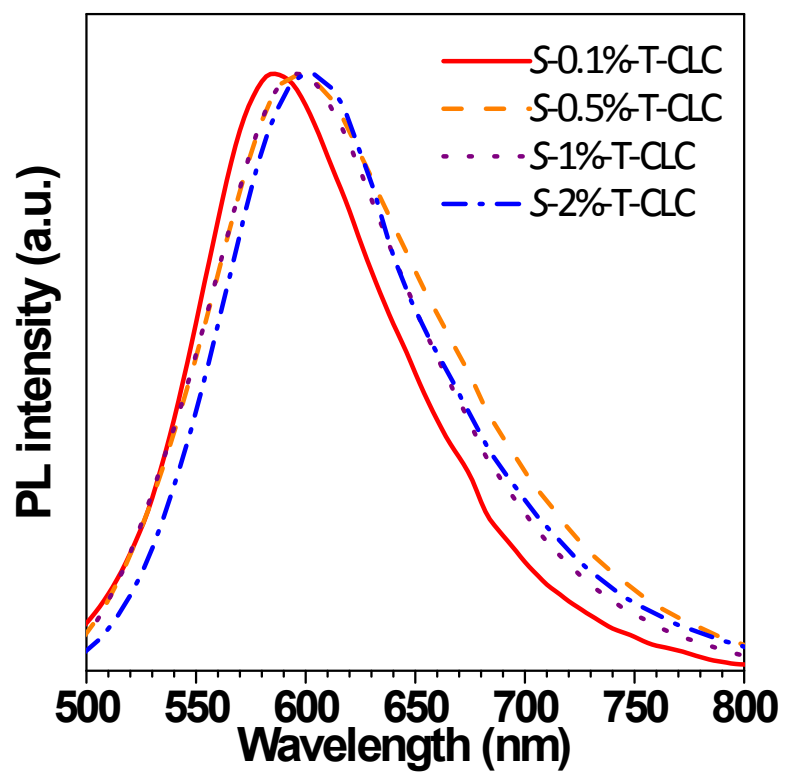

Fig. S10 PL spectra of *S*-T-CLC films with different weight ratios of TPETffBT,  $\lambda_{\text{ex}}$ : 457 nm.
